# Supplementary material for: Construction of a luminescent sensor based on a lanthanide complex for the highly efficient detection of methyl parathion
Source: Royal Society of Chemistry journal article supplement (doi:10.1039/c9ra01748h), 2019-01-01
Supplement: c9ra01748h1.pdf [file c9ra01748h1.pdf]

## Supporting information

### Construction of a luminescent sensor based on lanthanide complex for the highly efficient detection of methyl parathion

Xuan Hu <sup>a</sup>, Fengyi Wang <sup>a</sup>, Qianqian Peng <sup>a</sup>, Jing Hu <sup>a</sup>, Huaqiao Peng<sup>c</sup>, Lin Li<sup>c</sup>  
Baozhan Zheng <sup>a,b\*</sup>, Juan Du <sup>a,b\*</sup>, and Dan Xiao <sup>a,b</sup>

<sup>a</sup> College of Chemistry, Sichuan University, Chengdu 610064, China.

<sup>b</sup> Key Laboratory of Green Chemistry and Technology, Ministry of Education, Sichuan University, Chengdu 610064, China

<sup>c</sup> The Second Research Institute of Civil Aviation Administration of China(CAAC), Chengdu 610041, China

---

\* Corresponding authors.

E-mail address: [dujuanchem@scu.edu.cn](mailto:dujuanchem@scu.edu.cn) (J. Du); [zhengbaozhan@scu.edu.cn](mailto:zhengbaozhan@scu.edu.cn) (B. Zheng).

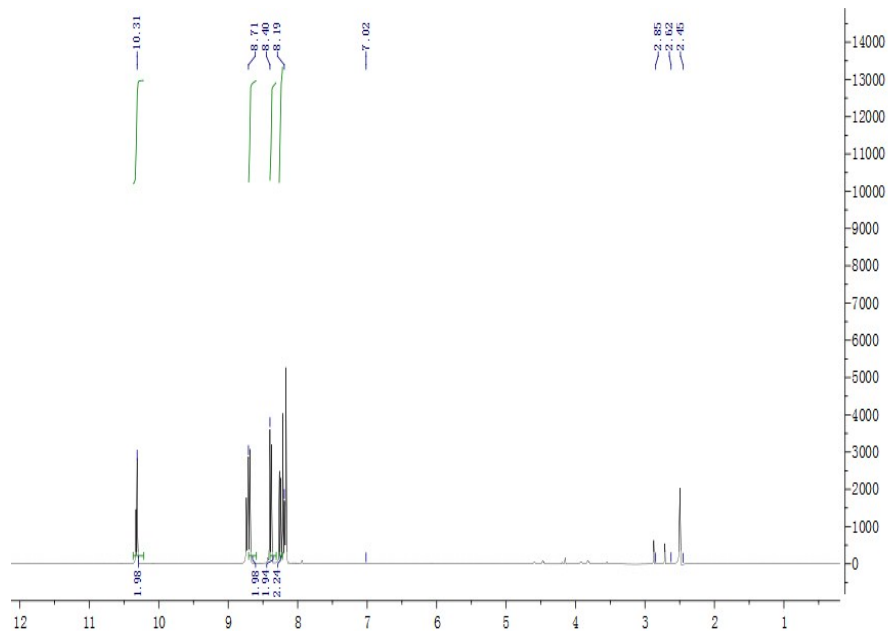

Fig.S1 <sup>1</sup>H NMR of Compound 1

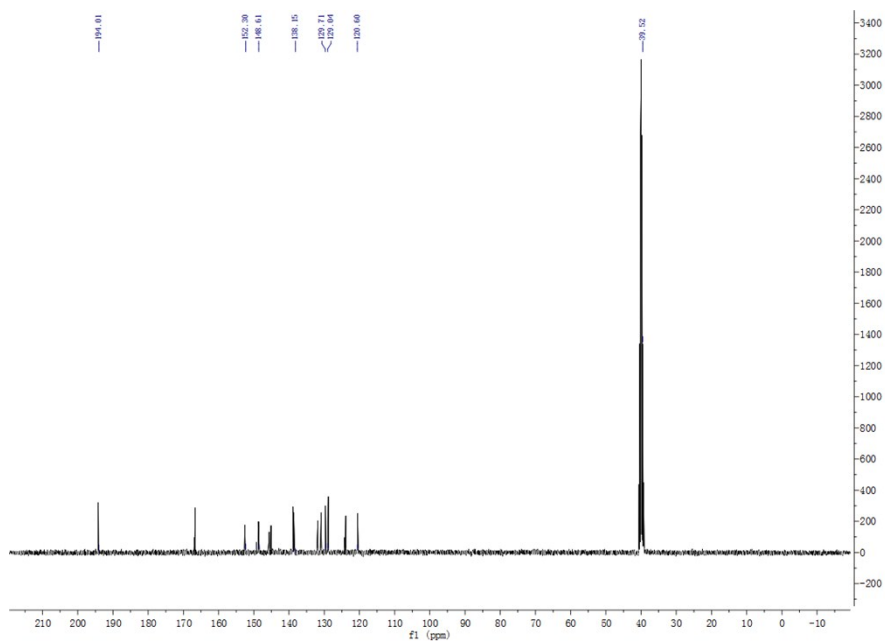

Fig.S2 <sup>13</sup>C NMR of Compound 1

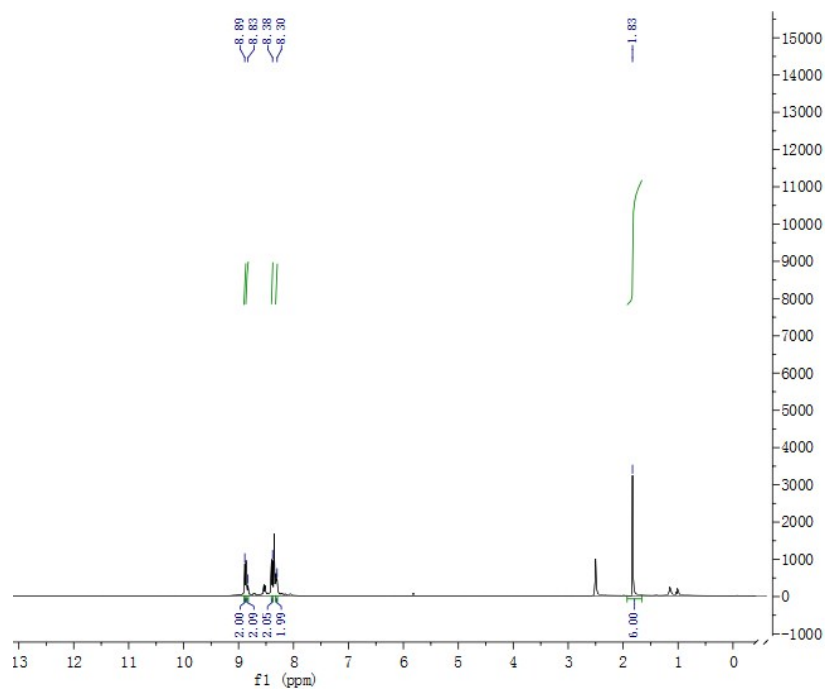

Fig.S3 <sup>1</sup>HNMR of Compound2

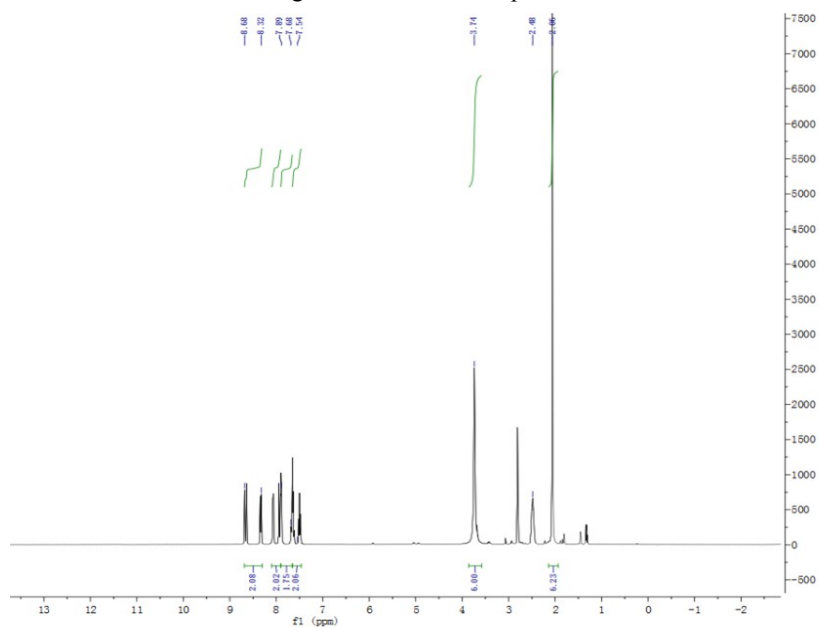

Fig.S4 <sup>1</sup>HNMR of HL

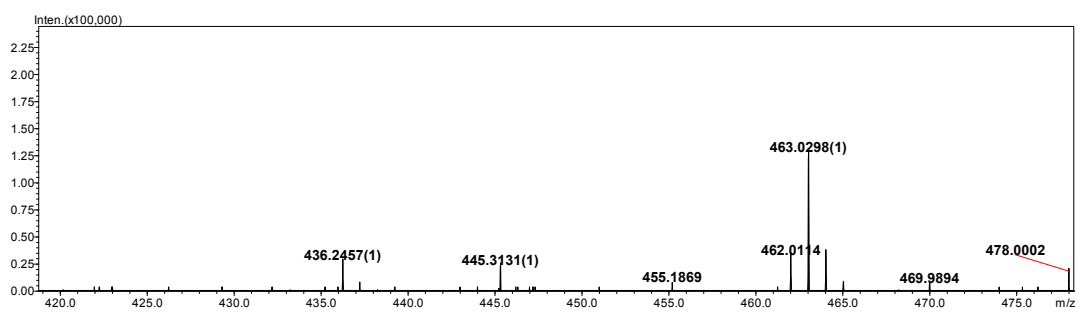

Fig.S5 ESI-MS spectrum of HL

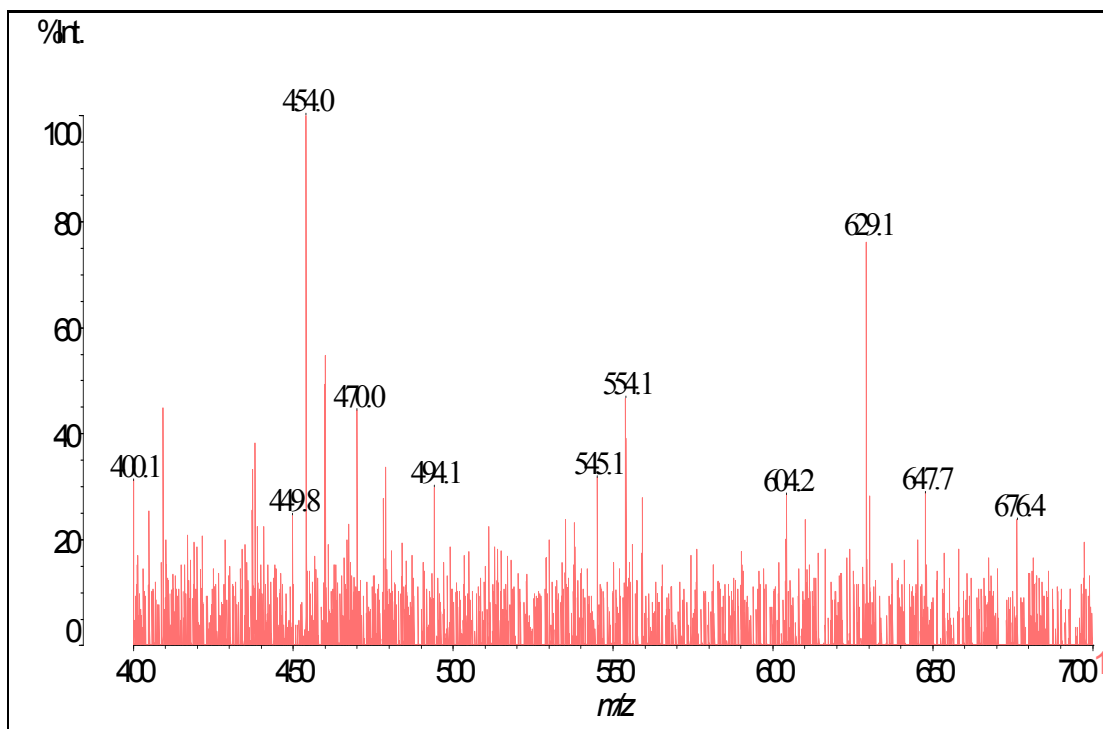

Fig.S6 MALDI-TOF MS of HL-Eu<sup>3+</sup>

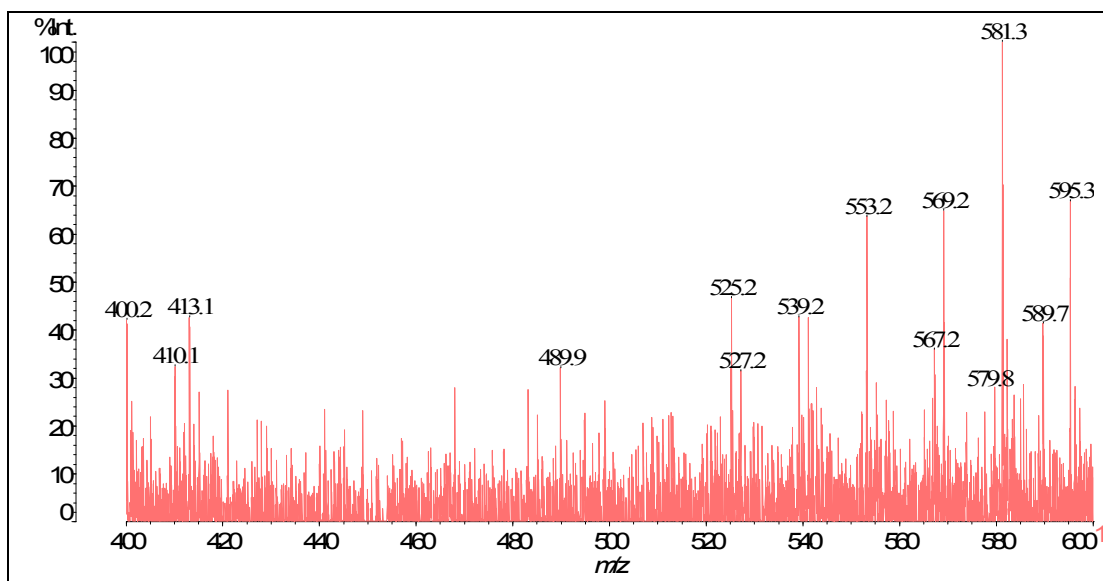

Fig.S7 MALDI-TOF MS data of the Eu-MP

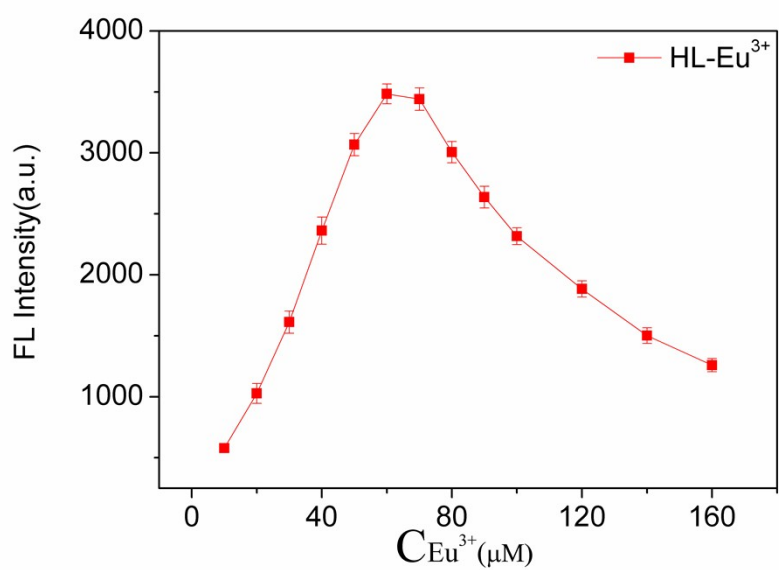

Fig.S8 The relationship between  $Eu^{3+}$  concentration and the fluorescence intensity of HL- $Eu^{3+}$

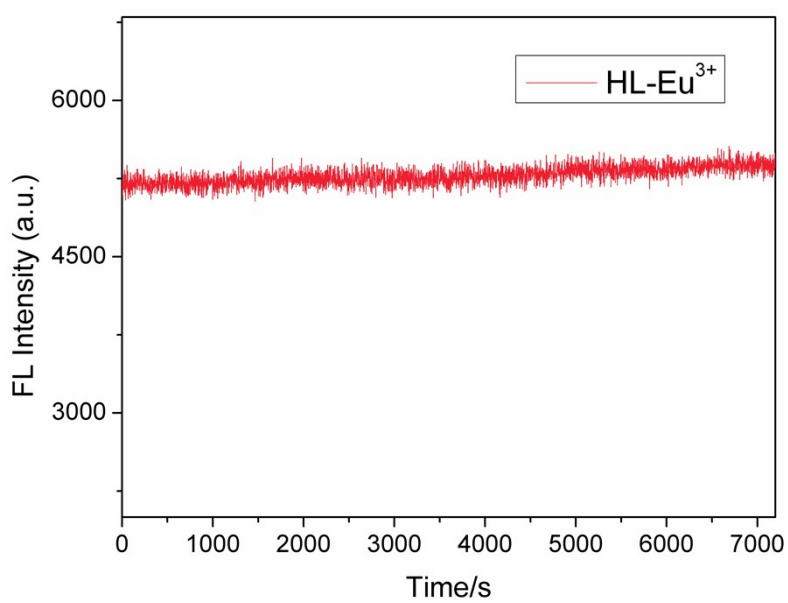

Fig.S9 The time-dependent fluorescence intensity of HL- $Eu^{3+}$

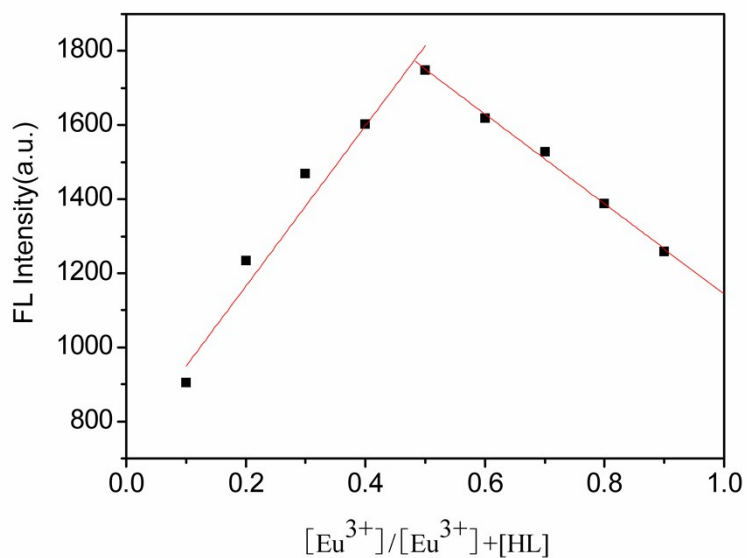

Fig. S10 Job's plot of the complex formed by HL and Eu<sup>3+</sup> at an invariant total concentration of 0.1 mM, where the intensity at 617 nm was plotted against the mole fraction of Eu<sup>3+</sup>

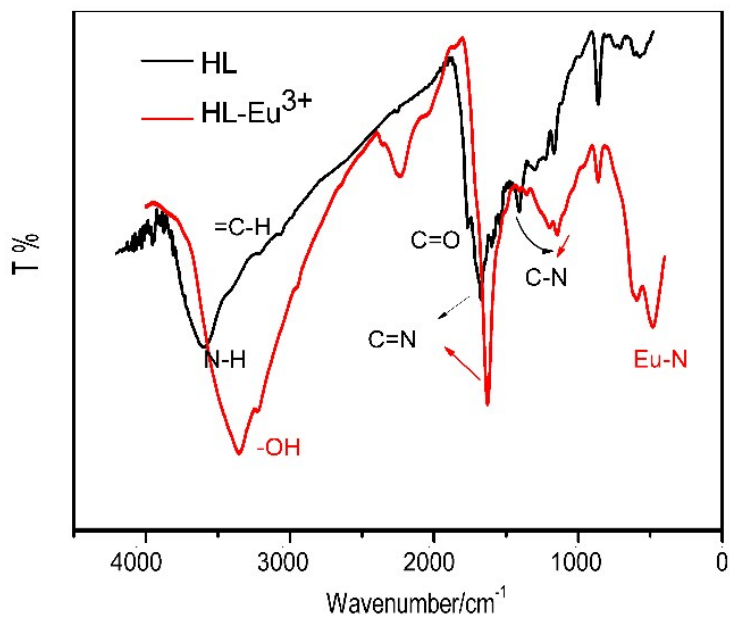

Fig.S11 FT-IR of HL and HL-Eu<sup>3+</sup>

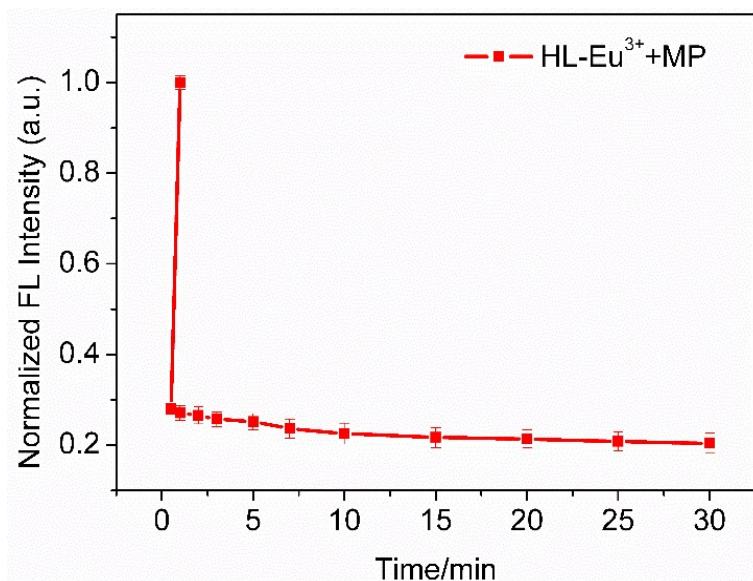

Fig.S12 Time-dependent fluorescence response of HL-Eu<sup>3+</sup> to MP

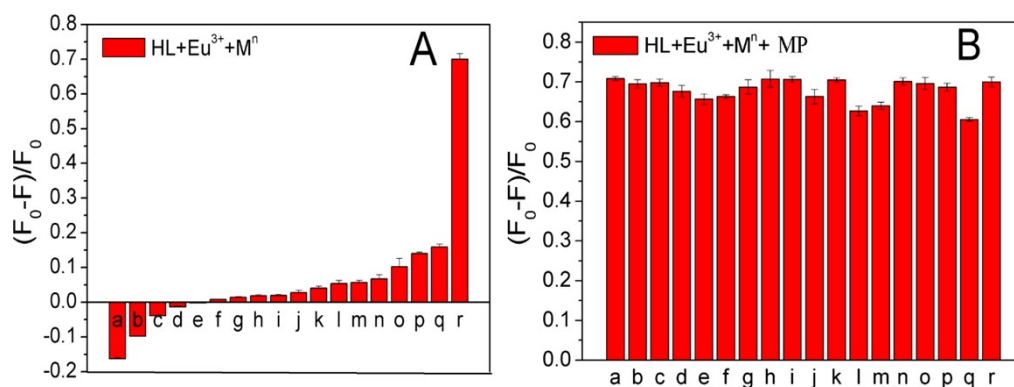

Fig.S13 the fluorescence intensities of HL-Eu<sup>3+</sup> at 617 nm were measured the presence of different metal ions (100 μM) and anions (100 μM). A: (a) Mg<sup>2+</sup>, (b) Ca<sup>2+</sup>, (c) Hg<sup>2+</sup>, (d) Na<sup>+</sup>, (e) Fe<sup>3+</sup>, (f) Pb<sup>2+</sup>, (g) Cd<sup>2+</sup>, (h) Zn<sup>2+</sup>, (i) Ba<sup>2+</sup>, (j) PO<sub>4</sub><sup>3-</sup>, (k) Ac<sup>-</sup>, (l) Br<sup>-</sup>, (m) HPO<sub>4</sub><sup>2-</sup>, (n) SO<sub>4</sub><sup>2-</sup>, (o) F<sup>-</sup>, (p) H<sub>2</sub>PO<sub>4</sub><sup>-</sup>, (q) NO<sub>3</sub><sup>-</sup>, (r) MP. B: The fluorescence intensity of HL-Eu<sup>3+</sup> to 20 μM MP in the presence of different metal ions (100 μM) and anions (100 μM). (a) Mg<sup>2+</sup>, (b) Ca<sup>2+</sup>, (c) Hg<sup>2+</sup>, (d) Na<sup>+</sup>, (e) Fe<sup>3+</sup>, (f) Pb<sup>2+</sup>, (g) Cd<sup>2+</sup>, (h) Zn<sup>2+</sup>, (i) Ba<sup>2+</sup>, (j) PO<sub>4</sub><sup>3-</sup>, (k) Ac<sup>-</sup>, (l) Br<sup>-</sup>, (m) HPO<sub>4</sub><sup>2-</sup>, (n) SO<sub>4</sub><sup>2-</sup>, (o) F<sup>-</sup>, (p) H<sub>2</sub>PO<sub>4</sub><sup>-</sup>, (q) NO<sub>3</sub><sup>-</sup>, (r) MP.

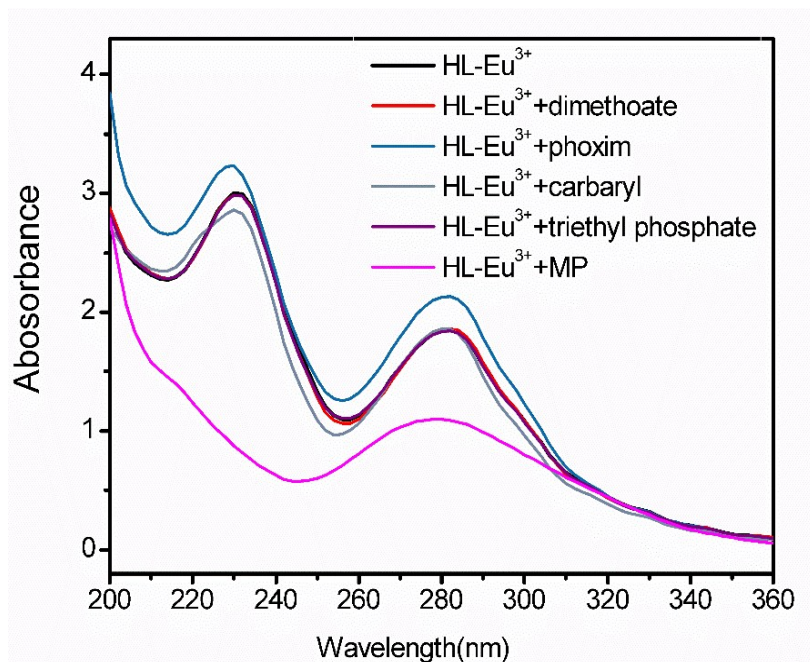

Fig.S14 the absorption spectra of HL-Eu<sup>3+</sup> with the addition of different OPs, including carbaryl, phoxim, triethyl phosphate, dimethoate and MP (20  $\mu$ M)

Table S1 Comparison of the present method with the literature for the determination of MP

| Fluorescent probes                                | Linear range                          | Detection limit                  | Reference |
|---------------------------------------------------|---------------------------------------|----------------------------------|-----------|
| CdTe QDs/CTAB                                     | 25-3000 ng·mL <sup>-1</sup>           | 18.0 ng·mL <sup>-1</sup>         | [1]       |
| AChE/Silica sol-gel flim/CPE                      | 0.1-0.5 ppb                           | 0.08 ppb                         | [2]       |
| Try-CDs                                           | 10 <sup>-10</sup> -10 <sup>-4</sup> M | 4.8 $\times$ 10 <sup>-11</sup> M | [3]       |
| Methyl parathion hydrolase biosens                | 0.2-100 ppb                           | 0.07 ppb                         | [4]       |
| Fe <sub>3</sub> O <sub>4</sub> imprinted polymers | 15-2500 ng/g                          | 5.2 ng/g                         | [5]       |
| screen printed carbon electrode                   | 2.0-80 $\mu$ M                        | 500 nM                           | [6]       |
| HPLC                                              | 1.03-75.99 $\mu$ M                    | 0.38 $\mu$ M                     | [7]       |
| Optical microbial biosensor                       | 4-80 $\mu$ M                          | 0.3 $\mu$ M                      | [8]       |
| Lipase@ZIF-8 nanoparticles GCE                    | 0.1-38 $\mu$ M                        | 0.28 $\mu$ M                     | [9]       |
| NCDs-MPH system                                   | 2.38-73.78 $\mu$ M                    | 0.338 $\mu$ M                    | [10]      |
| HL-Eu <sup>3+</sup>                               | 0.75-20 $\mu$ M                       | 95 nM                            | This work |

#### References:

- [1] X. Yan, H. Li, X. Wang and X. Su, *Talanta*, 2015, **131**, 88-94.  
 [2] P. Raghu, B. E. Kumara Swamy, T. Madhusudana Reddy, B. N. Chandrashekar and K. Reddaiah, *Bioelectro. Chemistry*,



2012, **83**, 19-24.

- [3] J. Hou, J. Dong, H. Zhu, X. Teng, S. Ai and M. Mang, *Biosens. Bioelectron.*, 2015, **68**, 20-26.
- [4] G. Liu, W. Guo and Z. Yin, *Biosens. Bioelectron.*, 2014, **53**, 440-446.
- [5] S. Xu, C. Guo, Y. Li, Z. Yu, C. Wei and Y. Tang, *J Hazard. Mater*, 2014, **264**, 34-41.
- [6] J. Kumar and S. F. D'Souza, *Biosens. Bioelectron.*, 2011, **26**, 4289-4293.
- [7] G. Huang, J. Ouyang, W. R. G. Baeyens, Y. Yang and C. Tao, *Anal. Chim. Acta*, 2002, **474**, 21-29.
- [8] J. Kumar, S. K. Jha and S. F. D'Souza, *Biosens. Bioelectron.*, 2006, **21**, 2100-2105.
- [9] B. Ma, L.-Z. Cheong, X. Weng, C.-P. Tan, C. Shen, *Electrochim. Acta* , 2018, **283**, 509–516.
- [10] W. Song, H.-J. Zhang, Y.-H. Liu, C.-L. Ren, H.-L. Chen, *Chin. Chem. Lett.* 2017, **28**, 1675–1680.
